# Supplementary material for: Pre-folded structures govern folding pathways of human telomeric G-quadruplexes
Source: PubMed Central journal article supplement — Nucleic Acids Res. 2020 Jan 17;48(4):2189–97. doi: 10.1093/nar/gkz1235 (PMC7038944; doi:10.1093/nar/gkz1235), 2020-01-17
Supplement: gkz1235_supplemental_file.pdf [file gkz1235_supplemental_file.pdf]

## SUPPLEMENTARY DATA

### **Pre-folded structures govern folding pathways of human telomeric G-quadruplexes**

Tjaša Freljih<sup>1</sup>, Baifan Wang<sup>1</sup>, Janez Plavec<sup>1,2,3\*</sup> and Primož Šket<sup>1\*</sup>

<sup>1</sup> Slovenian NMR Center, National Institute of Chemistry, Ljubljana, 1000, Slovenia

<sup>2</sup> EN-FIST Center of Excellence, Ljubljana, 1000, Slovenia

<sup>3</sup> University of Ljubljana, Faculty of Chemistry and Chemical Technology, 1000, Slovenia

\* To whom correspondence should be addressed. Tel: +386 1 4760223; Fax: +386 1 4760300; Email: primoz.sket@ki.si

Correspondence may also be addressed to Janez Plavec. Tel: +386 1 4760353; Fax: +386 1 4760300; Email: janez.plavec@ki.si

## Table of contents

|                                                                                                                                               |    |
|-----------------------------------------------------------------------------------------------------------------------------------------------|----|
| Figure S1: CD spectra.....                                                                                                                    | 3  |
| Figure S2: Native PAGE of 23-nt <i>htel1</i> d[TAGGG(TTAGGG) <sub>3</sub> ] and 25-nt <i>htel2</i> [TAGGG(TTAGGG) <sub>3</sub> TT].....       | 4  |
| Figure S3: Assignment of the <i>htel1</i> amino resonances of adenines at pH 5.....                                                           | 4  |
| Figure S4: Assignment of the <i>htel1</i> methyl resonances of thymines at pH 5.....                                                          | 5  |
| Table S1: Imino-imino NOE connectivities determined in 2D NOESY spectrum with mixing time of 150 ms. ....                                     | 5  |
| Figure S5: Aromatic-methyl region of 2D NOESY spectrum ( $\tau_m=150$ ms) of oligonucleotide <i>htel1</i> .....                               | 6  |
| Figure S6: Imino-methyl region of 2D NOESY spectrum ( $\tau_m=120$ ms) of oligonucleotide <i>htel1</i> .....                                  | 6  |
| Figure S7: Methyl-methyl region of 2D NOESY spectrum ( $\tau_m=150$ ms) of oligonucleotide <i>htel1</i> .....                                 | 7  |
| Figure S8: Amino-amino and imino-amino region of 2D NOESY spectrum ( $\tau_m=150$ ms) of oligonucleotide <i>htel1</i> .....                   | 7  |
| Figure S9: Amino-amino region of 2D NOESY spectrum ( $\tau_m=150$ ms) of oligonucleotide <i>htel1</i> .....                                   | 8  |
| Figure S10: Imino-amino region of 2D NOESY spectrum ( $\tau_m=150$ ms) of oligonucleotide <i>htel1</i> .....                                  | 8  |
| Table S2: NOE connectivities used to determine structure at pH 5.....                                                                         | 9  |
| Figure S11: Structural ensemble of ten lowest-energy structures of <i>htel1</i> pre-folded form at pH 5. ....                                 | 9  |
| Figure S12: Hydrogen bond formation. ....                                                                                                     | 10 |
| Table S3: Modified oligonucleotides.....                                                                                                      | 10 |
| Figure S13: Comparison of imino region of 1D <sup>1</sup> H NMR spectra of oligonucleotide <i>htel1</i> (bottom) and modified sequences. .... | 11 |
| Figure S14: Site-specific replacements of guanine to nebularine residues. ....                                                                | 12 |
| Table S4: Comparison of imino proton chemical shifts at pH 5 and 7.....                                                                       | 13 |

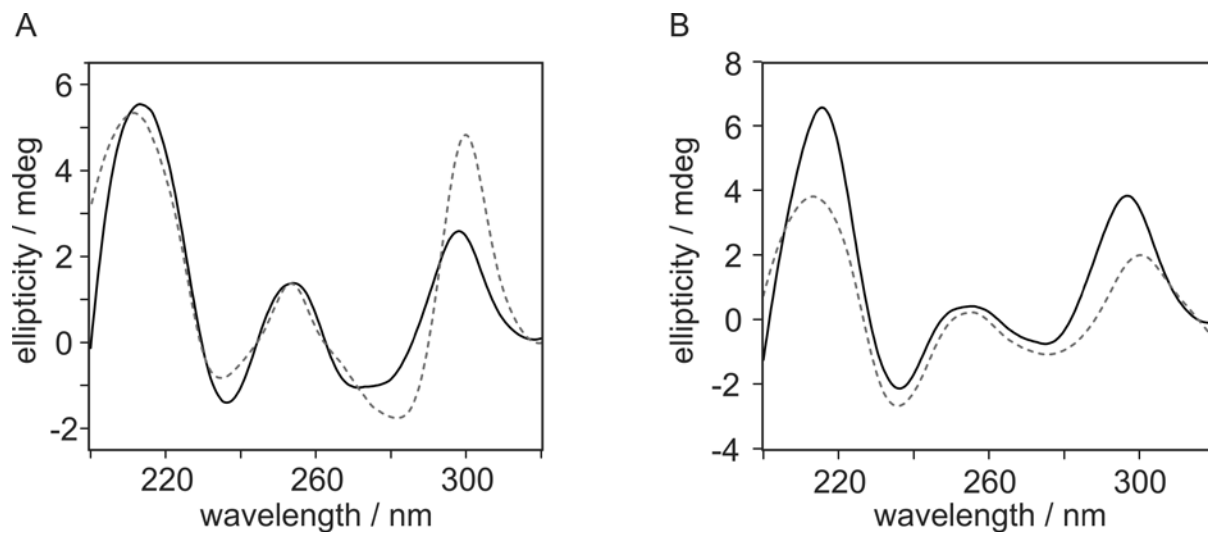

**Figure S1.** CD spectra. **(A)** of *htel1* at pH 7 (solid line) and pH 5 (dashed line). **(B)** of *htel2* at pH 7 (solid line) and pH 5 (dashed line). CD spectra were recorded at 5 °C in the absence of cations that promote G-quartet formation at DNA concentration of 1.0 mM.

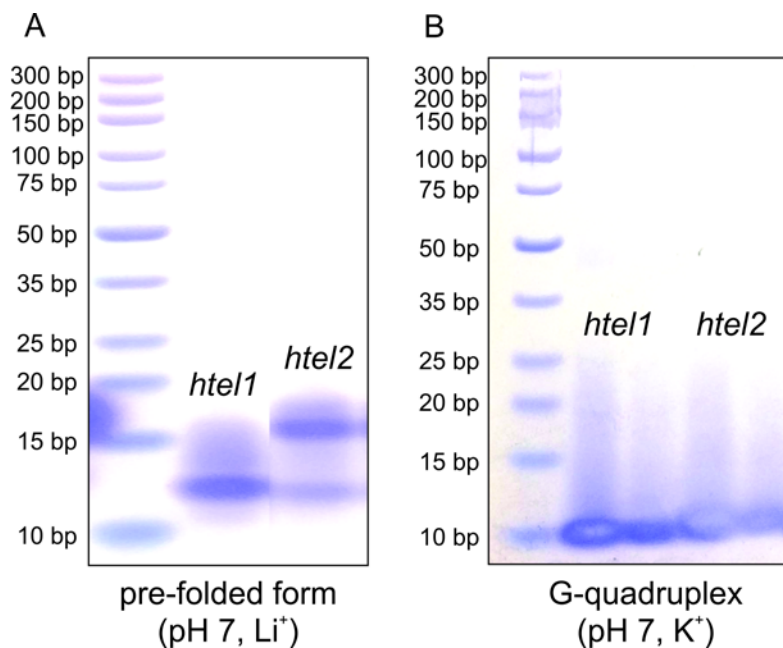

**Figure S2.** Native PAGE of 23-nt *htel1* d[ $\text{TAGGG}(\text{TTAGGG})_3$ ] and 25-nt *htel2* [TAGGG(TTAGGG) $_3$ TT]. (A) at pH 7 in the presence of 30 mM concentration of  $\text{Li}^+$  ions, and (B) at pH 7 in the presence of 70 mM concentration of  $\text{K}^+$  ions. On the left side of each gel marker was loaded. Gels ran at 5 °C overnight.

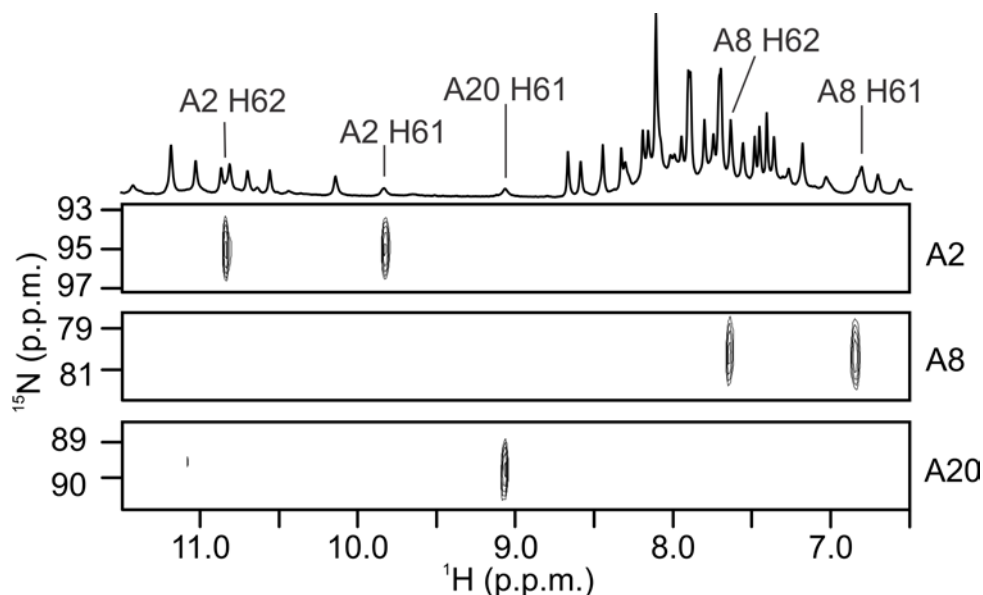

**Figure S3.** Assignment of the *htel1* amino resonances of adenines at pH 5. Top: 1D  $^1\text{H}$  NMR spectrum of unlabelled oligonucleotide *htel1*. Bottom: 2D  $^1\text{H}$ - $^{15}\text{N}$  HSQC spectra acquired on partly (~ 8 %) residue-specific  $^{15}\text{N}$ ,  $^{13}\text{C}$ -labelled oligonucleotides. Spectra were recorded in 10 %  $^2\text{H}_2\text{O}$  on 800 MHz spectrometer at 5 °C and pH 5 in the absence of cations that promote G-quartet formation at DNA concentration of 1.0 mM.

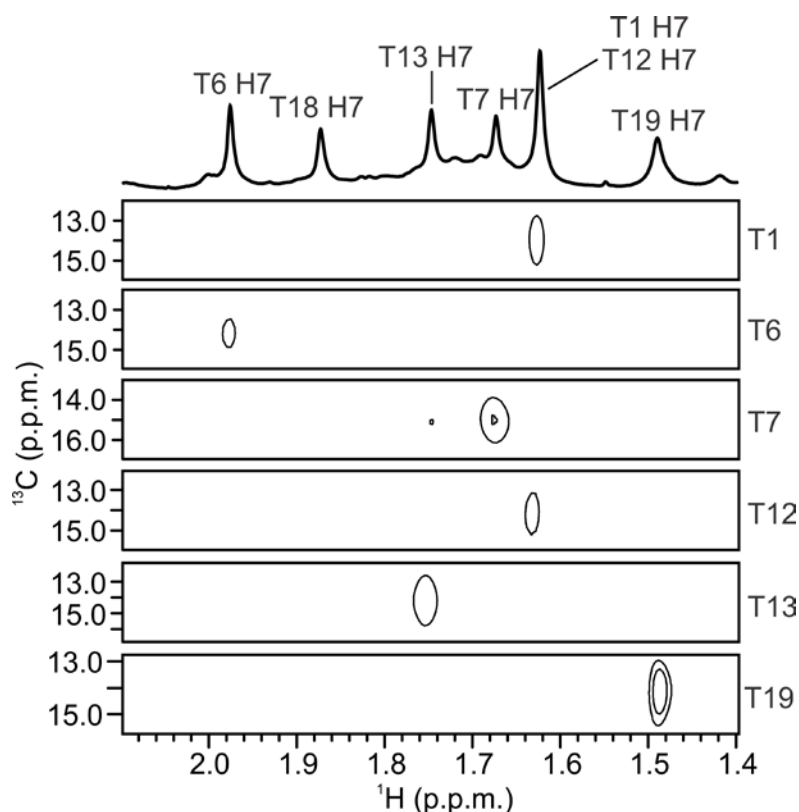

**Figure S4.** Assignment of the *htel1* methyl resonances of thymines at pH 5. Top: 1D  $^1\text{H}$  NMR spectrum of unlabelled oligonucleotide *htel1*. Bottom: 2D  $^1\text{H}$ - $^{13}\text{C}$  HSQC spectra acquired on partly (~ 8 %) residue-specific  $^{15}\text{N}$ ,  $^{13}\text{C}$ -labelled oligonucleotides. Spectra were recorded in 10 %  $^2\text{H}_2\text{O}$  on 600 MHz spectrometer at 5 °C in the absence of cations that promote G-quartet formation at DNA concentration of 1.0 mM.

**Table S1.** Imino-imino NOE connectivities determined in 2D NOESY spectrum with mixing time of 150 ms.

| Stronger NOE connectivities                                            | Weaker NOE connectivities |
|------------------------------------------------------------------------|---------------------------|
| G3 H1 – T12 H3                                                         | G3 H1 – G17 H1            |
| G3 H1 – G16 H1                                                         | G4 H1 – G11 H1            |
| G4 H1 – $^1\text{T6 H3/G9 H1}$                                         | T7 H3 – T19 H3            |
| G4 H1- G10 H1                                                          | T7 H3 – G21 H1            |
| G5 H1 – G17 H1                                                         |                           |
| G5 H1 – T18 H3                                                         |                           |
| G5 H1 – T19 H3                                                         |                           |
| $^1\text{T6 H3/G9 H1}$ – G10 H1                                        |                           |
| $^1\text{T6 H3/G9 H1}$ – G17 H1                                        |                           |
| T12 H3 – G11 H1                                                        |                           |
| T18 H3 – T19 H3                                                        |                           |
| $^1$ Imino protons of T6 H3 and G9 H1 have isochronous chemical shifts |                           |

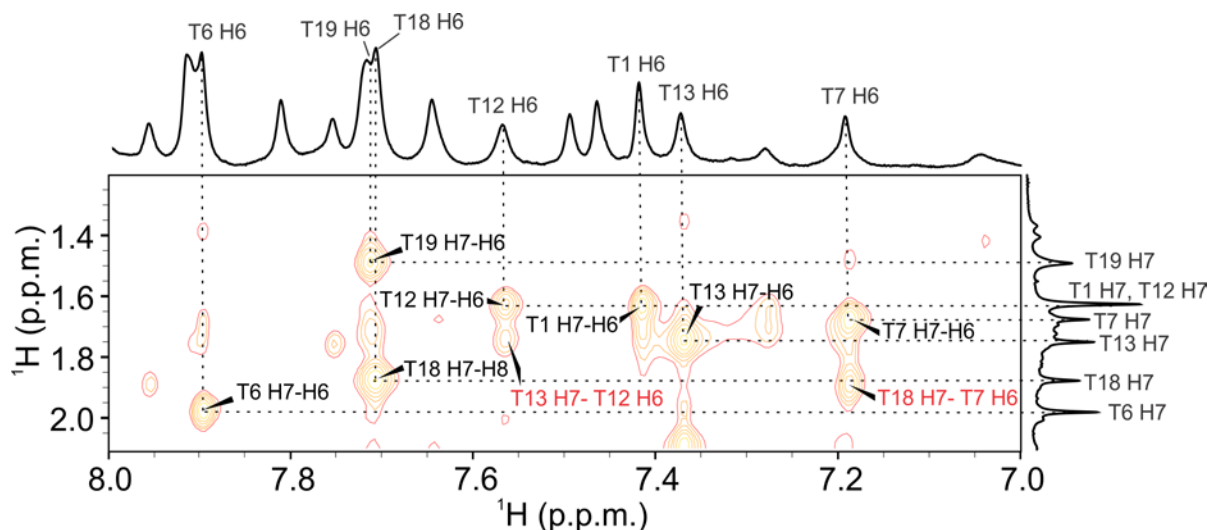

**Figure S5.** Aromatic-methyl region of 2D NOESY spectrum ( $\tau_m=150$  ms) of oligonucleotide *htel1*. Spectrum was recorded in 10 %  $^2\text{H}_2\text{O}$  on 800 MHz spectrometer at 5 °C and pH 5 in the absence of cations that promote G-quartet formation at DNA concentration of 1.0 mM.

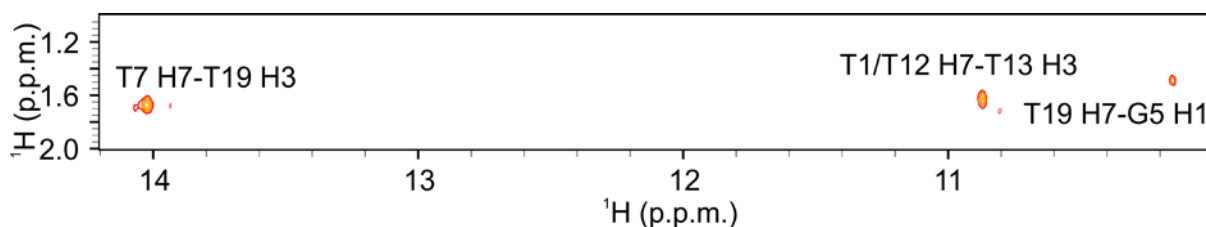

**Figure S6.** Imino-methyl region of 2D NOESY spectrum ( $\tau_m=120$  ms) of oligonucleotide *htel1*. Spectrum was recorded in 10 %  $^2\text{H}_2\text{O}$  on 800 MHz spectrometer at 5 °C and pH 5 in the absence of cations that promote G-quartet formation at DNA concentration of 1.0 mM.

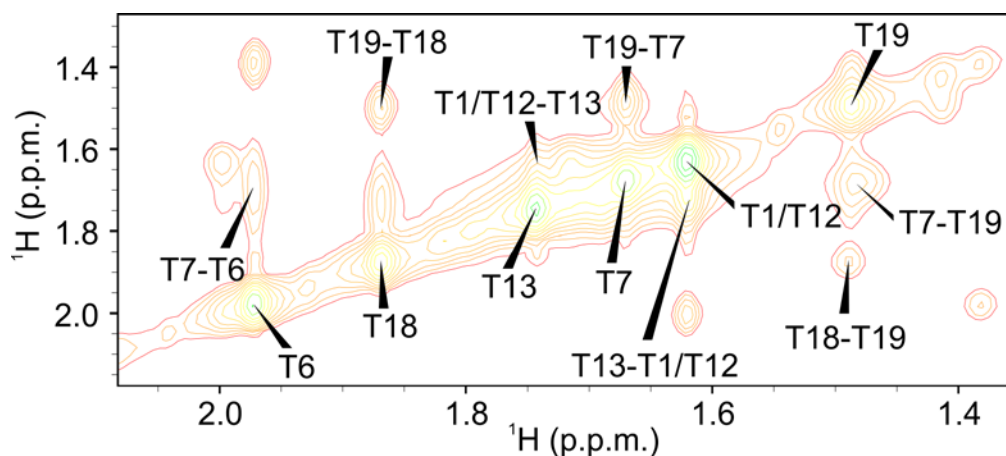

**Figure S7.** Methyl-methyl region of 2D NOESY spectrum ( $\tau_m=150$  ms) of oligonucleotide *htel1*. Spectrum was recorded in 10 %  $^2\text{H}_2\text{O}$  on 800 MHz spectrometer at 5 °C and pH 5 in the absence of cations that promote G-quartet formation at DNA concentration of 1.0 mM.

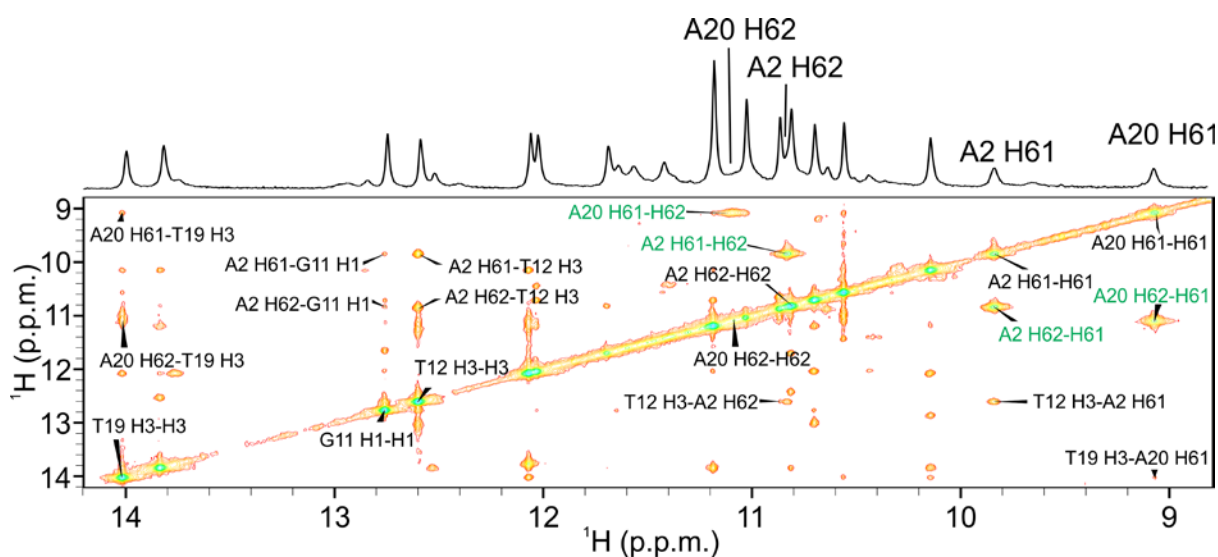

**Figure S8.** Amino-amino and imino-amino region of 2D NOESY spectrum ( $\tau_m=150$  ms) of oligonucleotide *htel1*. Spectrum was recorded in 10 %  $^2\text{H}_2\text{O}$  on 800 MHz spectrometer at 5 °C and pH 5 in the absence of cations that promote G-quartet formation at DNA concentration of 1.0 mM.

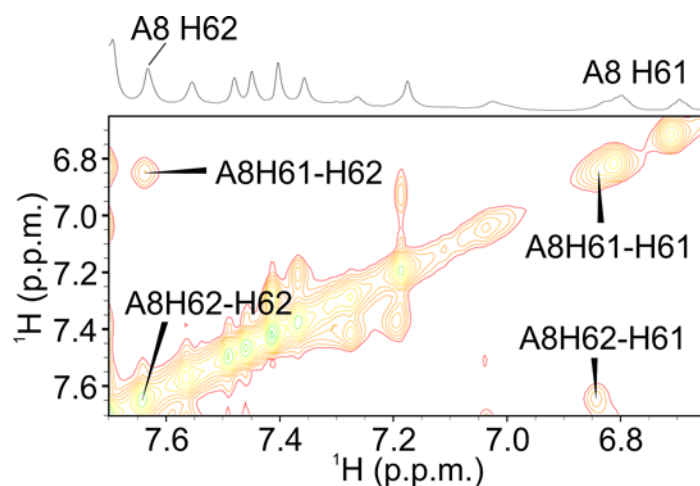

**Figure S9.** Amino-amino region of 2D NOESY spectrum ( $\tau_m=150$  ms) of oligonucleotide *htel1*. Spectrum was recorded in 10 %  $^2\text{H}_2\text{O}$  on 800 MHz spectrometer at 5 °C and pH 5 in the absence of cations that promote G-quartet formation at DNA concentration of 1.0 mM.

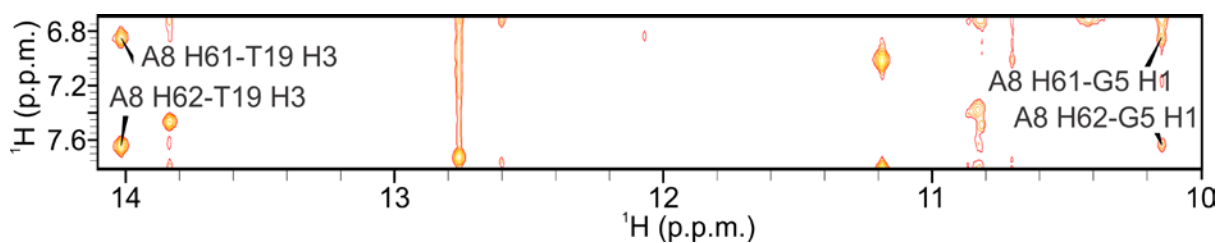

**Figure S10.** Imino-amino region of 2D NOESY spectrum ( $\tau_m=150$  ms) of oligonucleotide *htel1*. Spectrum was recorded in 10 %  $^2\text{H}_2\text{O}$  on 800 MHz spectrometer at 5 °C and pH 5 in the absence of cations that promote G-quartet formation at DNA concentration of 1.0 mM.



**Table S2.** NOE connectivities used to determine structure at pH 5.

| H1/H3-H1/H3    | H1/H3-H7     | H7-H7        | H7-H6 (T) | H61-H62 (A) | H61/H62-H1/H3 |
|----------------|--------------|--------------|-----------|-------------|---------------|
| G3 – T12       | T19 – T7     | T7 – T6      | T13 – T12 | A2 – A2     | A2 – G11      |
| G3 – G16       | G5 – T19     | T19 – T18    | T18 – T7  | A8 – A8     | A2 – T12      |
| T6 H3/G9 – G10 | T13 – T1/T12 | T1/T12 – T13 |           | A20 – A20   | A8 – T19      |
| T6 H3/G9 – G17 |              | T19 – T7     |           |             | A8 – G5       |
| G5 – G17       |              |              |           |             | A20 – T19     |
| G5 – T18       |              |              |           |             |               |
| G5 – T19 H3    |              |              |           |             |               |
| G4 – T6/G9     |              |              |           |             |               |
| G4 – G10       |              |              |           |             |               |
| T12 – G11      |              |              |           |             |               |
| T18 – T19      |              |              |           |             |               |
| G3 – G17       |              |              |           |             |               |
| G4 – G11       |              |              |           |             |               |
| T7 – T19       |              |              |           |             |               |
| T7 – G21       |              |              |           |             |               |

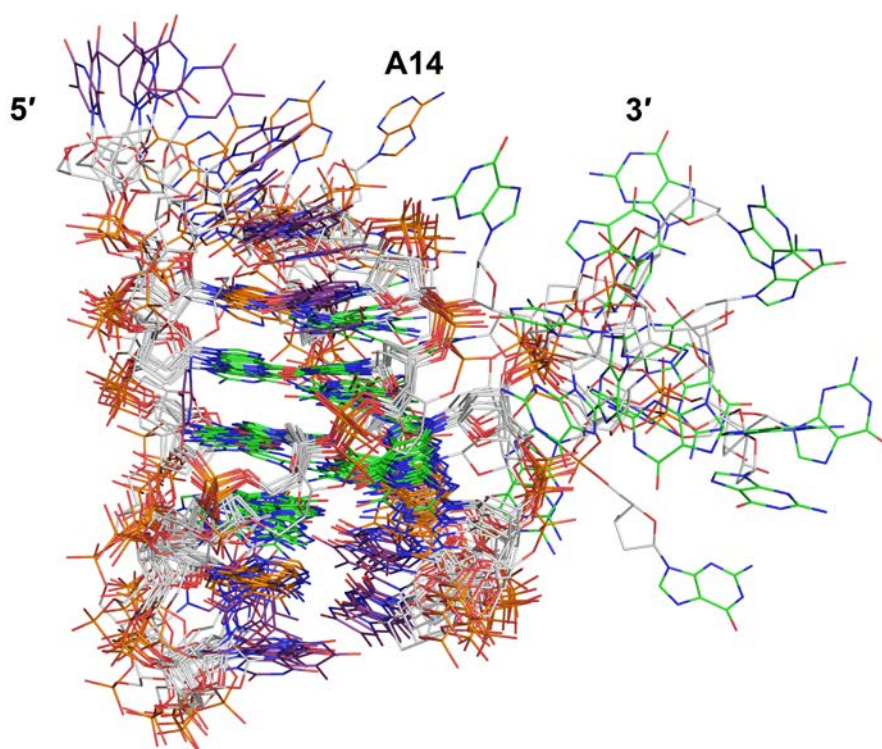

**Figure S11.** Structural ensemble of ten lowest-energy structures of *hte1* pre-folded form at pH 5. Guanines are coloured in green; adenines are orange; thymine residues are purple; sugar rings are grey.

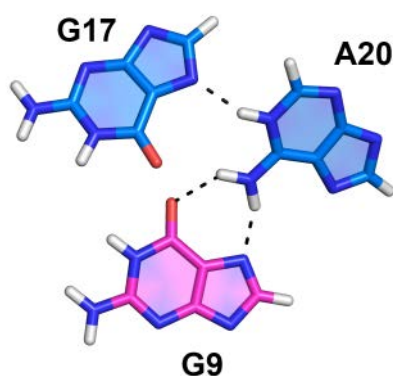

**Figure S12.** Hydrogen bond formation. Hydrogen bond formation between A20 and G9 as well as G17.

**Table S3.** Modified oligonucleotides.

| Modified oligonucleotide sequences |                                                       |
|------------------------------------|-------------------------------------------------------|
| <i>htel1 A2T</i>                   | d(T <b>T</b> GGGTTAGGGTTAGGGTTAGGG)                   |
| <i>htel1 A8T</i>                   | d(TAGGGTT <b>T</b> GGGTTAGGGTTAGGG)                   |
| <i>htel1 A14T</i>                  | d(TAGGGTTAGGGTT <b>T</b> GGGTTAGGG)                   |
| <i>htel1 A20T</i>                  | d(TAGGGTTAGGGTTAGGGTT <b>T</b> GGG)                   |
| <i>htel1 A2,8T</i>                 | d( <b>T</b> TGGGTT <b>T</b> GGGTTAGGGTTAGGG)          |
| <i>htel1 A2,20T</i>                | d( <b>T</b> TGGGTTAGGGTTAGGGTT <b>T</b> GGG)          |
| <i>htel1 A2,8,20T</i>              | d( <b>T</b> TGGGTT <b>T</b> GGGTTAGGGTT <b>T</b> GGG) |
| <i>htel1 ΔAGGG</i>                 | d(TAGGGTTAGGGTTAGGGTT)                                |
| <i>htel1 ΔGGG</i>                  | d(TAGGGTTAGGGTTAGGGTTA)                               |
| <i>htel1 ΔGG</i>                   | d(TAGGGTTAGGGTTAGGGTTAG)                              |
| <i>htel1 ΔG</i>                    | d(TAGGGTTAGGGTTAGGGTTAGG)                             |

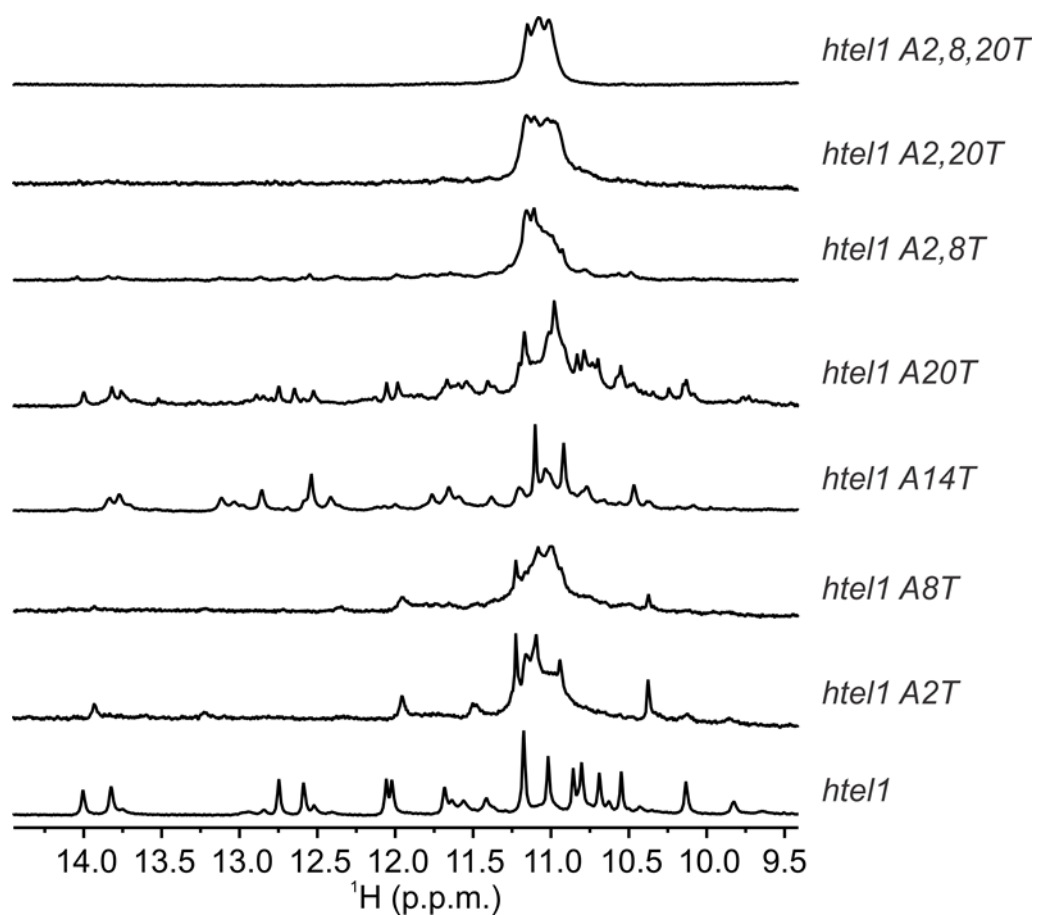

**Figure S13.** Comparison of imino region of 1D  $^1\text{H}$  NMR spectra of oligonucleotide *htel1* (bottom) and modified sequences. Adenine residues were replaced with thymine residues in the sequence. Spectra were recorded in 10 %  $^2\text{H}_2\text{O}$  on 800 MHz spectrometer at 5 °C and pH 5 in the absence of cations that promote G-quartet formation at DNA concentration of 1.0 mM.

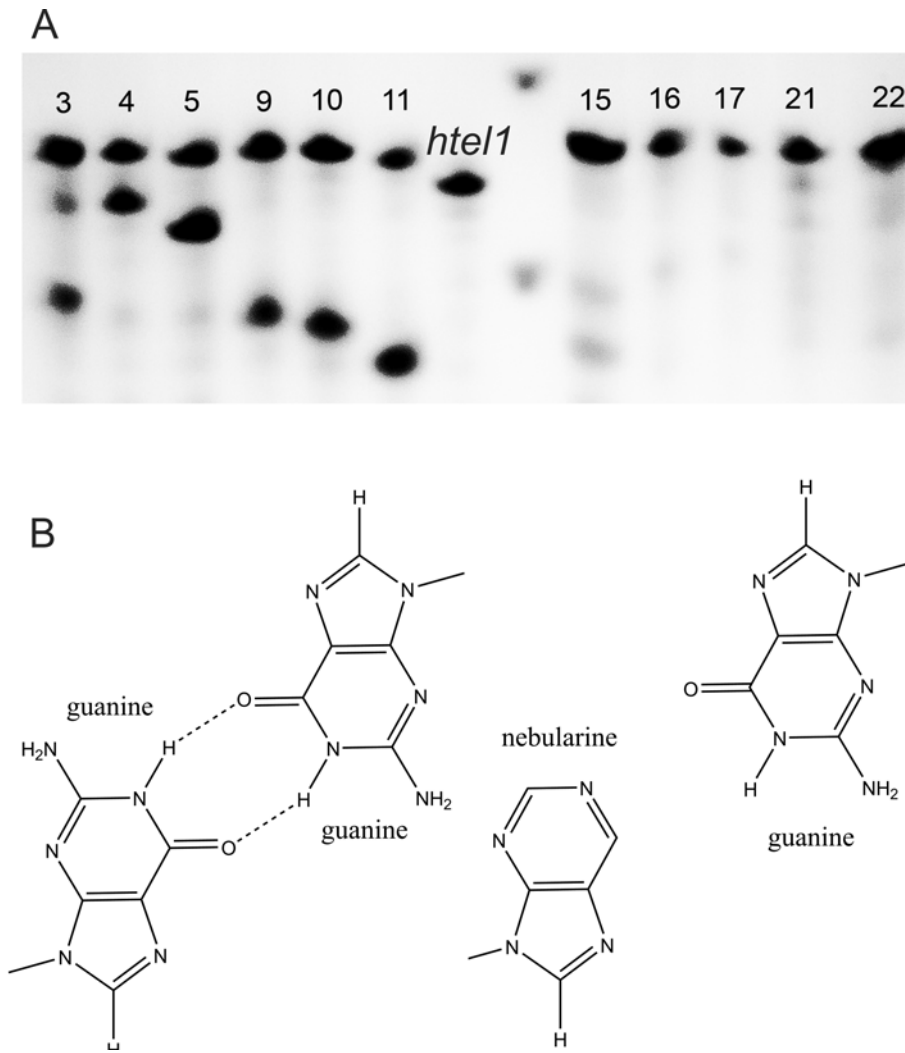

**Figure S14.** Site-specific replacements of guanine to nebularine residues. **(A)** Native PAGE of 23-nt *htel1* d[TAGGG(TTAGGG)<sub>3</sub>] and of oligonucleotides with site-specific replacement of guanine to nebularine residues. Number above bands indicates at which position within oligonucleotide *htel1* is nebularine instead of guanine residue. **(B)** Schematic presentation of hydrogen bonds within GG N1-carbonyl base pair as well as the absence of hydrogen bonds between nebularine and guanine residues.

**Table S4.** Comparison of imino proton chemical shifts at pH 5 and 7. Chemical shifts were measured at 5 °C. All shifts are referenced to DSS.

|                                                                                         | $\delta$ at pH 5 | $\delta$ at pH 7 |
|-----------------------------------------------------------------------------------------|------------------|------------------|
| <b>T1</b>                                                                               | 11.05            | 10.69            |
| <b>G3</b>                                                                               | 10.83            | 11.82            |
| <b>G4</b>                                                                               | 10.70            | 12.96            |
| <b>G5</b>                                                                               | 10.16            | 12.88            |
| <b>T6</b>                                                                               | 11.21            | 13.89            |
| <b>T7</b>                                                                               | 10.58            | 10.38            |
| <b>G9</b>                                                                               | 11.21            | 11.47            |
| <b>G10</b>                                                                              | 12.09            | 10.56            |
| <b>G11</b>                                                                              | 12.78            | 11.62            |
| <b>T12</b>                                                                              | 12.60            | ~ 11.10          |
| <b>T13</b>                                                                              | 10.87            | 10.51            |
| <b>G15</b>                                                                              | /                | 12.83            |
| <b>G16</b>                                                                              | 11.72            | 11.57            |
| <b>G17</b>                                                                              | 13.82            | 12.57            |
| <b>T18</b>                                                                              | 12.09            | 13.73            |
| <b>T19</b>                                                                              | 14.02            | /                |
| <b>G21</b>                                                                              | 11.46            | 11.37            |
| <b>G22</b>                                                                              | /                | ~ 11.05          |
| <b>G23</b>                                                                              | /                | 10.69            |
| / - Not determined because of the absence of the signal.<br>Chemical shifts are in ppm. |                  |                  |
